# Supplementary material for: Protein kinase A determines platelet life span and survival by regulating apoptosis
Source: JCI journal article supplement (doi:10.1172/jci95109), 2017-10-29
Supplement: sd1 [file 1]

## SUPPLEMENTAL DATA

### Supplemental Figures

#### Supplemental Figure 1

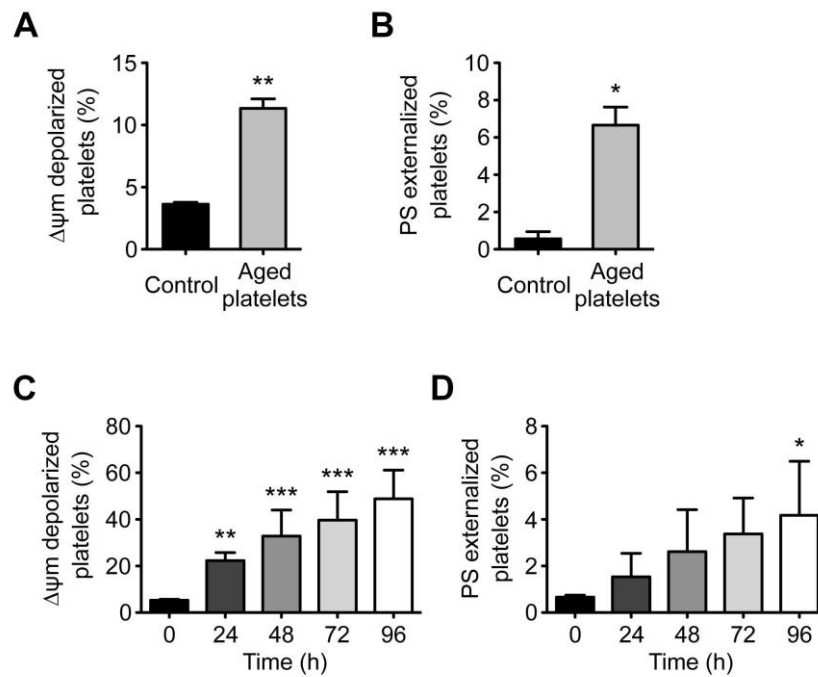

#### Supplemental Figure 1

Apoptotic events of stored platelets. **(A and B)** PRP was incubated at 37°C under agitation for 0 (control) or 16 h. The pretreated platelets were analyzed for mitochondrial membrane potential ( $\Delta\psi_m$ ) depolarization and phosphatidylserine (PS) exposure by flow cytometry. Data are means  $\pm$  SD from four independent experiments. \* $P < 0.05$ , \*\* $P < 0.01$ , compared with control by Student's  $t$ -test. **(C and D)** Washed platelets ( $3 \times 10^8/\text{mL}$ ) were incubated at 22°C for indicated time.  $\Delta\psi_m$ -depolarized platelets and PS-positive platelets were examined by flow cytometry. The results are from four independent experiments with different donors. \* $P < 0.05$ , \*\* $P < 0.01$ , \*\*\* $P < 0.001$  versus control by one-way ANOVA.

## Supplemental Figure 2

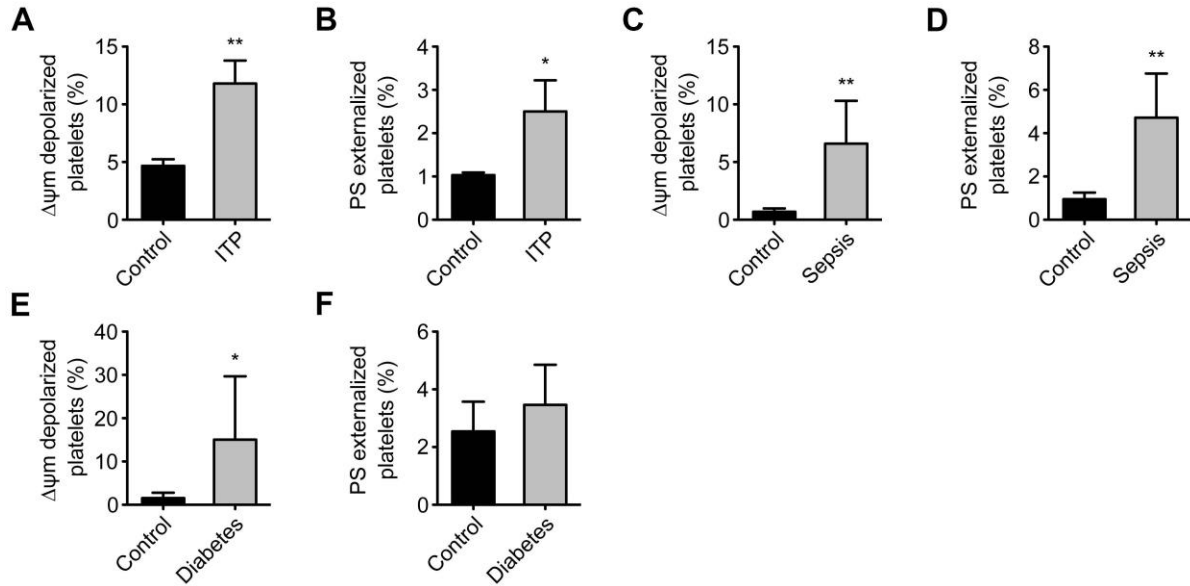

## Supplemental Figure 2

Apoptotic events in platelets from patients with ITP, diabetes and sepsis. PRP from patients with ITP (**A** and **B**), sepsis (**C** and **D**), and diabetes (**E** and **F**) and age- and sex-matched health controls was analyzed for  $\Delta\psi_m$  depolarization and PS exposure by flow cytometry. Data are means  $\pm$  SD of six patients and age- and sex-matched health controls. \* $P < 0.05$ , \*\* $P < 0.01$ , compared with health controls by Student's  $t$ -test.

### Supplemental Figure 3

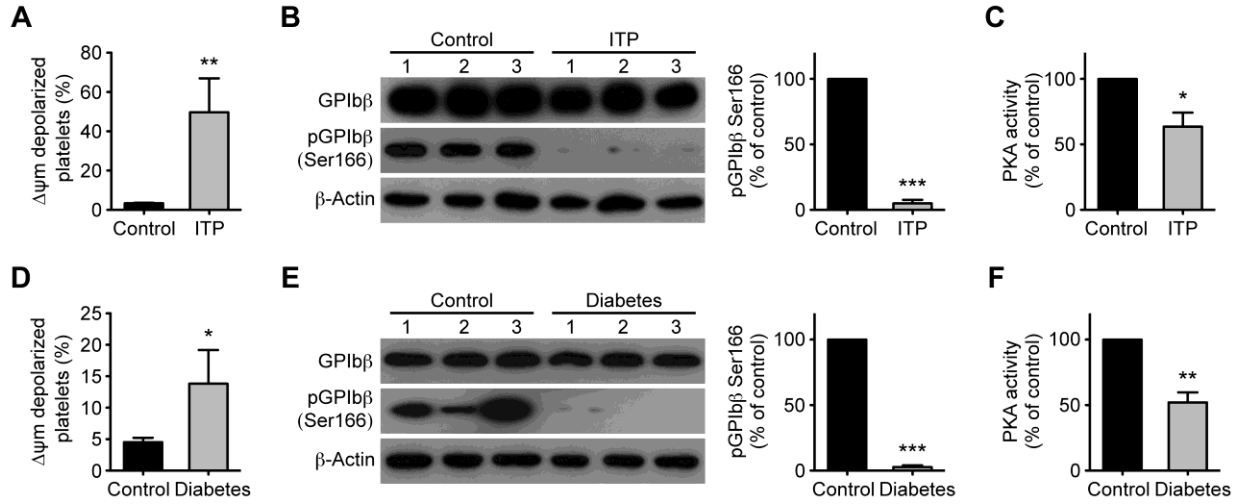

### Supplemental Figure 3

Plasma from patients with ITP and diabetes induces normal platelet apoptosis and reduction of PKA activity. Washed platelets ( $3 \times 10^8/\text{mL}$ ) were incubated with plasma (1:1 volume) from patients with ITP and diabetes or age- and sex-matched health controls at  $37^\circ\text{C}$  for 12 h. (**A** and **D**)  $\Delta\psi_m$ -depolarized platelets were examined. Platelets were separated and lysed immediately. Total and phosphorylated GPIIb/IIIa was detected by western blot with anti-GPIIb/IIIa and anti-pGPIIb/IIIa Ser-166 antibodies. Representative western blots are shown. The blots were analyzed by Image J software. Densitometry of immunoblots for pGPIIb/IIIa/GPIIb/IIIa (arbitrary unit) normalized to control platelets is shown (**B** and **E**). PKA activity was examined by ELISA with PKA activity kit as described in method. PKA activity equals (sample average absorbance-blank average absorbance)/quantity of protein used per assay, normalized to control platelets (**C** and **F**). Data are means  $\pm$  SD of six patients and controls. \* $P < 0.05$ , \*\* $P < 0.01$ , \*\*\* $P < 0.001$ , compared with control by Student's *t*-test.

## Supplemental Figure 4

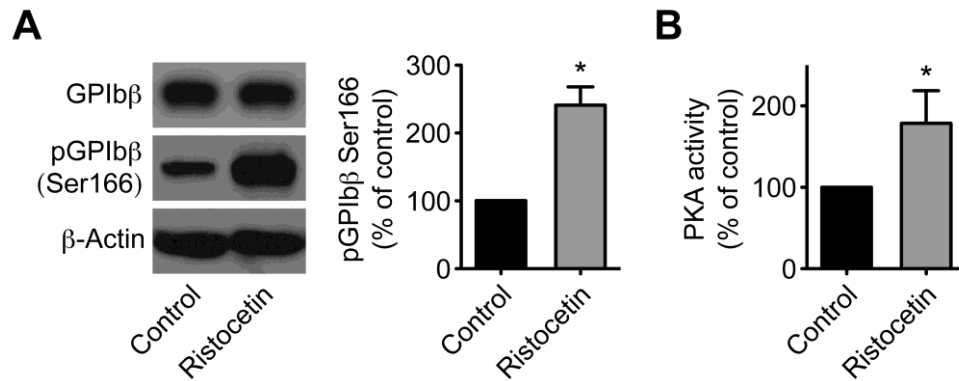

## Supplemental Figure 4

PKA activity is elevated in platelets stimulated with ristocetin. PRP was stimulated with ristocetin (1 mg/mL) or vehicle control at 37°C for 5 min in aggregometer. The stimulated platelets were lysed. The total and phosphorylated GPIIb/IIIa (**A**) and total PKA activity (**B**) were examined. Representative western blots are shown. The results were from three independent experiments with different donors. \* $P < 0.05$ , compared with control by Student's  $t$ -test.

**Supplemental Figure 5**

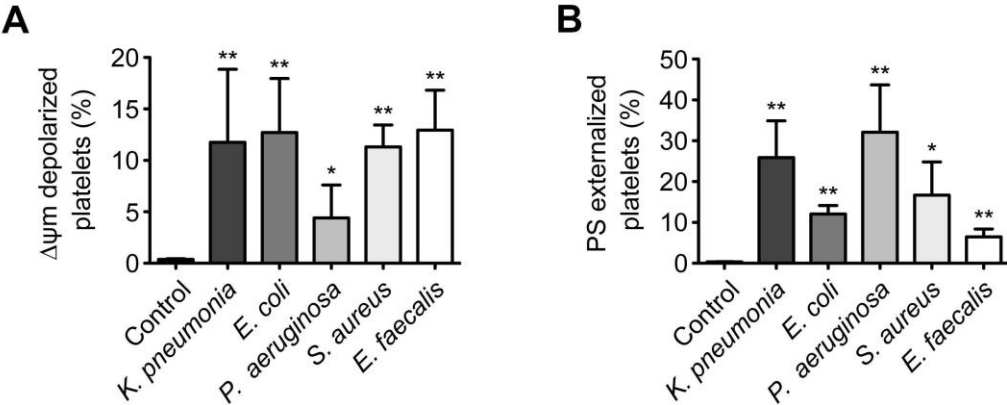

**Supplemental Figure 5**

Bacterium induces apoptotic events in platelets. Washed platelets ( $1 \times 10^7$ /mL) in MTB were incubated with indicated bacteria (1:20) or vehicle control at 37°C for 90 min.  $\Delta\psi_m$  depolarization and PS exposure were analyzed with flow cytometry. Means  $\pm$  SD of the percentage of  $\Delta\psi_m$ -depolarized platelets and PS positive platelets from six independent experiments are shown. \* $P < 0.05$ , \*\* $P < 0.01$ , compared with control platelets by Mann-Whitney test.

## Supplemental Figure 6

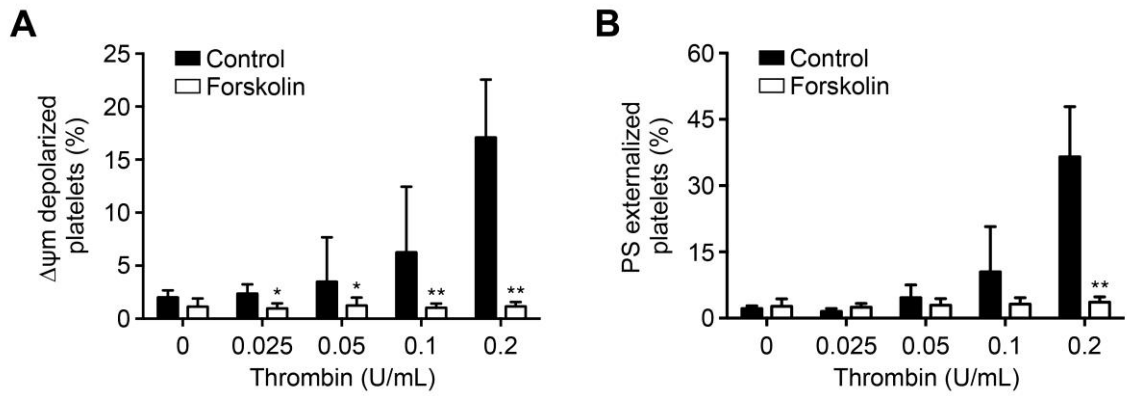

## Supplemental Figure 6

PKA activator (forskolin) reduces apoptotic events in platelets stimulated by thrombin. Washed human platelets were incubated with forskolin (5  $\mu$ M) or vehicle (control) at 37°C for 30 min, and further incubated with indicated concentrations of thrombin or vehicle (0) at 37°C for 30 min. Data are means  $\pm$  SD of  $\Delta\psi_m$  depolarization (**A**) and PS (**B**) exposure from three independent experiments. \* $P < 0.05$ , \*\* $P < 0.01$ , by two-way ANOVA.

## Supplemental Figure 7

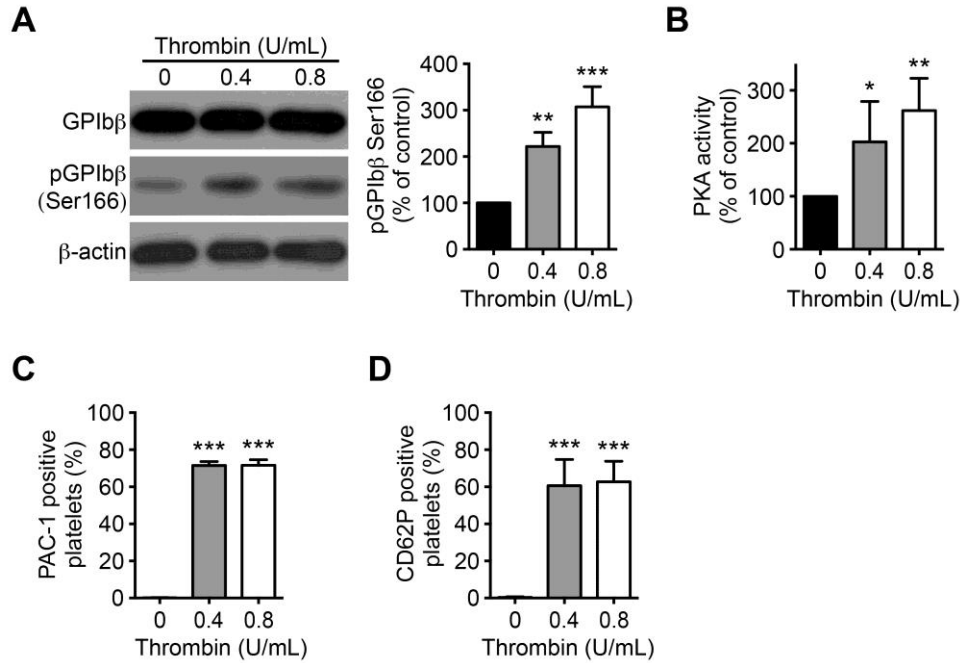

## Supplemental Figure 7

Higher concentration of thrombin elevated PKA activity and activated platelets. Washed platelets were incubated with indicated concentration of thrombin or vehicle at 37°C for 30 min. (**A** and **B**) Platelets were separated and lysed immediately. Total and phosphorylated GPIIb/IIIa was detected by western blot with anti-GPIIb/IIIa and anti-pGPIIb/IIIa Ser-166 antibodies. PKA activity was examined by ELISA with PKA activity kit as described in method. Representative immunoblots and quantification for pGPIIb/IIIa (**A**) and PKA activity (**B**) are shown. Data are expressed as means  $\pm$  SD from four independent experiments. \* $P < 0.05$ , \*\* $P < 0.01$ , \*\*\* $P < 0.001$ , compared with control, by one-way ANOVA. (**C** and **D**) Platelet activation was detected by P-selectin (CD62-P) surface exposure and integrin  $\alpha$ IIb $\beta$ <sub>3</sub> activation. The treated platelets were incubated with FITC-labeled anti-CD62-P antibody or FITC-labeled PAC-1 at RT for 20 minutes in the dark and then subjected to flow cytometry analysis. Quantifications of PAC-1 (**C**) and CD62P (**D**) positive platelets were shown (mean  $\pm$  SD,  $n = 6$ ). \*\*\* $P < 0.001$  compared with control, by one-way ANOVA.

## Supplemental Figure 8

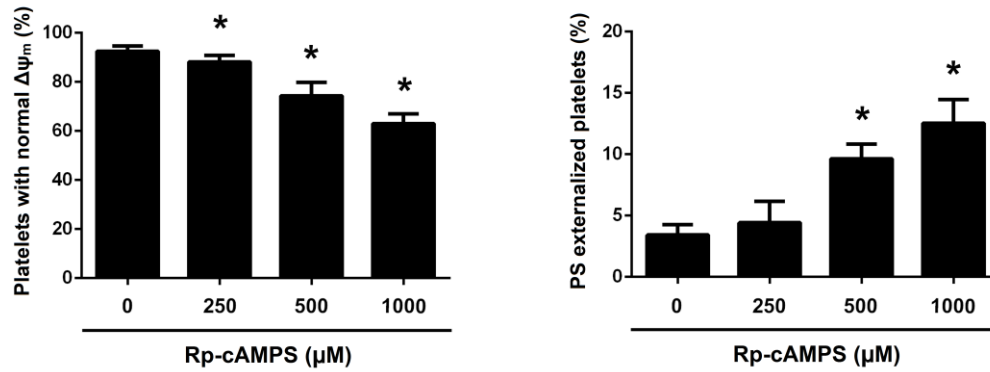

## Supplemental Figure 8

PKA inhibitor Rp-cAMPS induces platelet apoptosis. Washed human platelets ( $1 \times 10^8/\text{ml}$ ) were treated with Rp-cAMPS (250  $\mu\text{M}$ , 500  $\mu\text{M}$ , 1000  $\mu\text{M}$ ) or vehicle at 37°C for 24 h. TMRE (100 nM) was added into the pre-treated platelets. Then samples were further incubated in the dark at 37°C for 5 min and subjected to flow cytometry. Annexin V binding buffer was mixed with the pre-incubated platelets and FITC-annexin V at a 50:10:1 ratio. Samples were gently mixed and incubated at RT for 15 min in the dark, then subjected to flow cytometry analysis. Means  $\pm$  SD of the percentage of platelets with normal  $\Delta\psi_m$  and PS positive platelets from four independent experiments are shown. \* $P < 0.05$ , compared with vehicle control platelets by one-way ANOVA.



Supplemental Figure 9

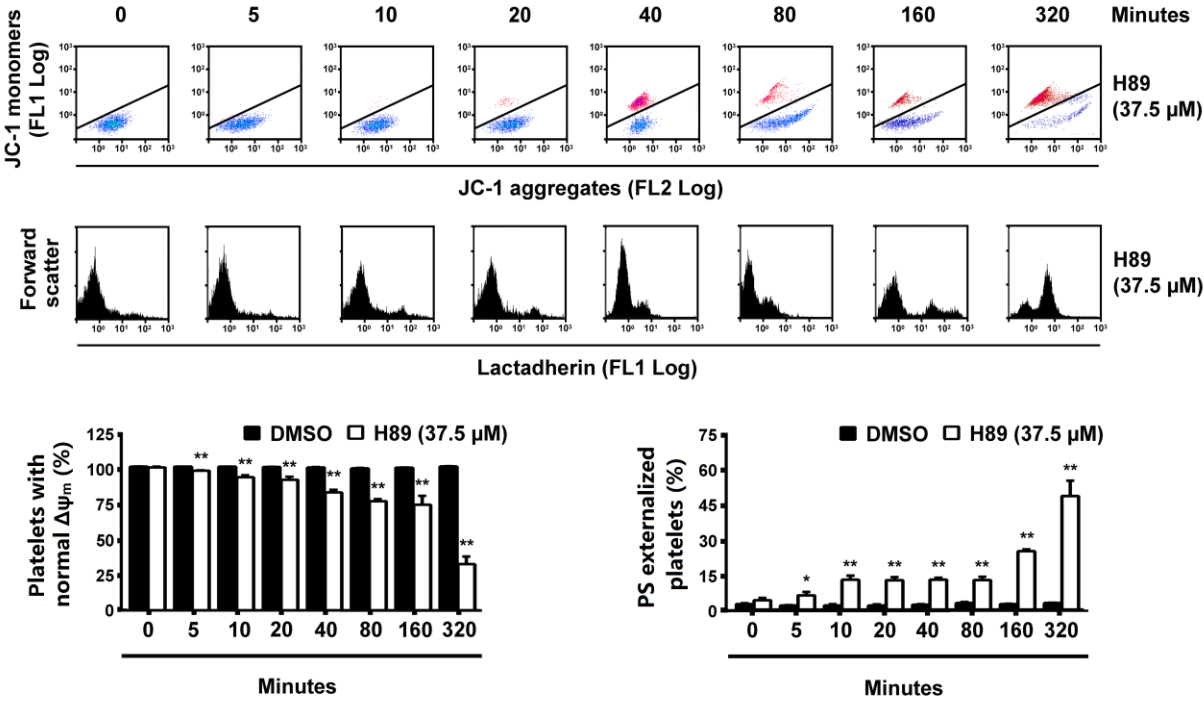

Supplemental Figure 9

H89 time-dependently induced apoptotic events in platelets. Washed platelets were incubated with H89 (37.5  $\mu\text{M}$ ) or vehicle control at 22 $^{\circ}\text{C}$  for indicated time.  $\Delta\psi_m$  depolarization (JC-1) and PS exposure were detected by flow cytometry. Representative flow cytometric figures are shown (up). Means  $\pm$  SD of the percentage of platelets with normal  $\Delta\psi_m$  and PS positive platelets from three independent experiments are shown. \* $P < 0.05$ , \*\* $P < 0.01$ , compared with control by two-way ANOVA.

**Supplemental Figure 10**

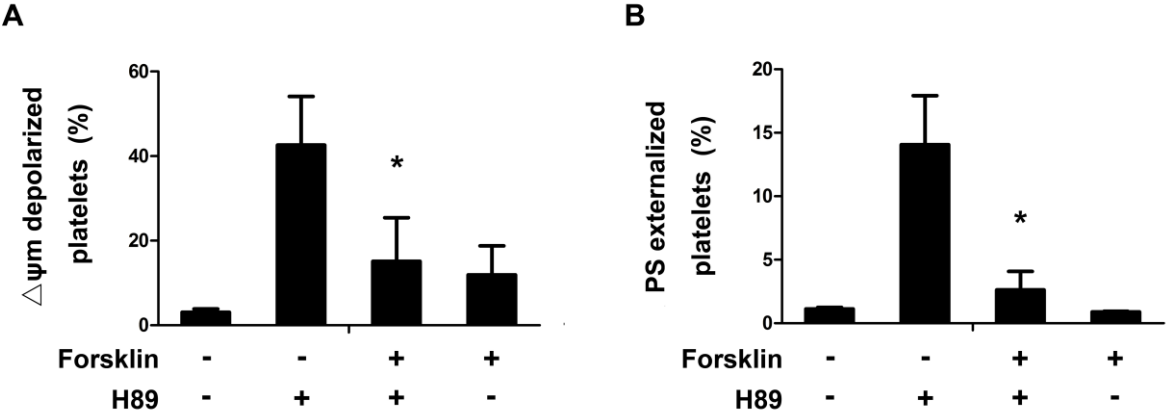

**Supplemental Figure 10**

PKA activator forskolin reduces H89-induced apoptotic events. Washed human platelets were incubated with forskolin (10 μM) or vehicle at 22°C for 10 min, and were further incubated with H89 (20 μM) or vehicle control at 22°C for 320 min. Δψ<sub>m</sub> depolarization (**A**) and PS exposure (**B**) were detected by flow cytometry. Means ± SD of the percentage of platelets with Δψ<sub>m</sub> depolarization and PS exposure from four independent experiments are shown. \**P* < 0.05, compared with control by one-way ANOVA.

## Supplemental Figure 11

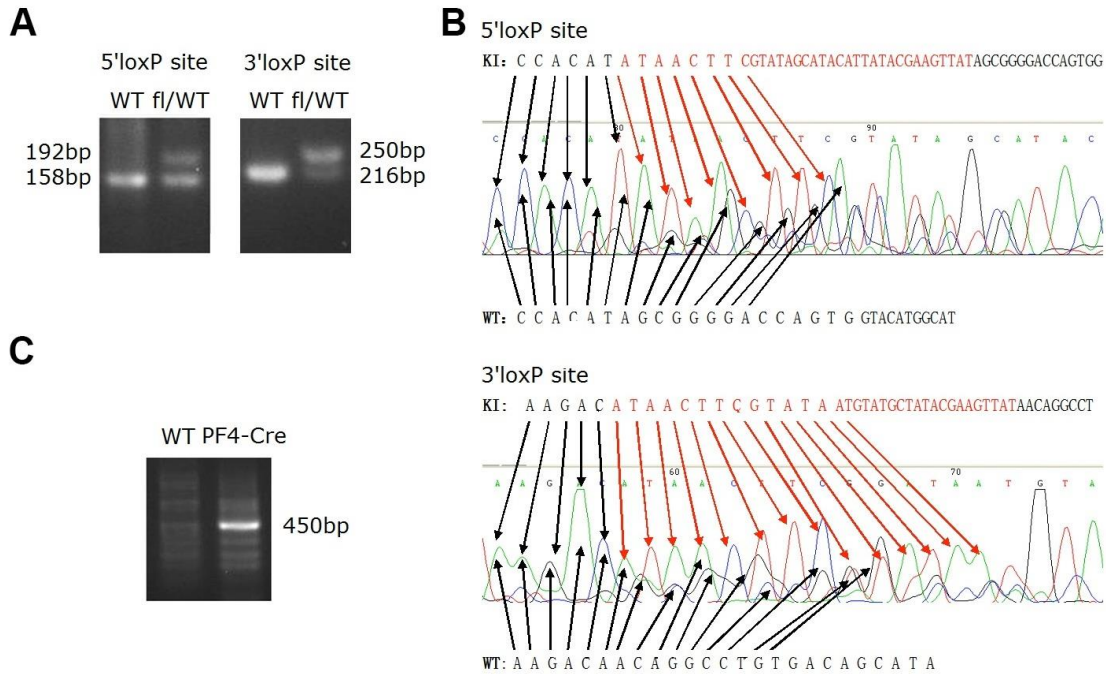

## Supplemental Figure 11

PCR and sequencing genotyping of mouse tail DNA. Conditional gene knockout donor DNA designed to delete the exons 6, 7 and 8 of *PKA C $\alpha$*  genomic DNA by insertion of loxP sites flanking the targeted exons. The donor DNA contains a 192bp short homologous arm 5' of and a 250bp short homologous arm 3' of the floxed target exons. After Cre-treatment, the floxed exons 6, 7 and 8 was removed in vivo to result in a null allele. **(A)** The WT versus floxed alleles are detected using primers against the 5' loxP site and 3' loxP site, respectively. **(B)** 5' loxP and 3' loxP sequences are detected using primers *PKA C $\alpha$ -F* and *PKA C $\alpha$ -R*, respectively. The black arrows indicate WT sequence; the red arrows indicate inserted sequence. **(C)** The WT versus Cre alleles (450bp) are detected using primers against Cre gene.

Supplemental Figure 12

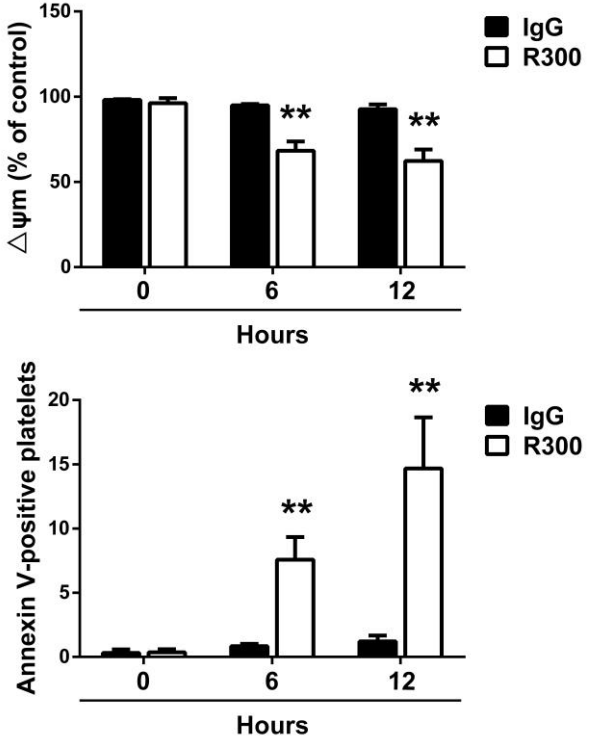

Supplemental Figure 12

Anti-mouse platelet antibodies (R300) incur platelet apoptosis. Washed mouse platelets were incubated with R300 (10  $\mu\text{g}/\text{mL}$ ) or IgG (10  $\mu\text{g}/\text{mL}$ ) at 37°C for different time, and then analyzed for  $\Delta\psi_m$  depolarization and PS exposure by flow cytometry. Means  $\pm$  SD from three independent experiments are shown. \*\* $P < 0.01$ , compared with IgG control by two-way ANOVA.

**Supplemental Figure 13**

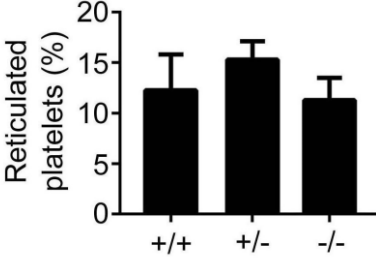

**Supplemental Figure 13**

Flow cytometric measurement for reticulated platelets. Data are means  $\pm$  SD of 7  $PKA^{+/+}$ , 7  $PKA^{+/-}$  and 5  $PKA^{-/-}$  male mice.

**Supplemental Figure 14**

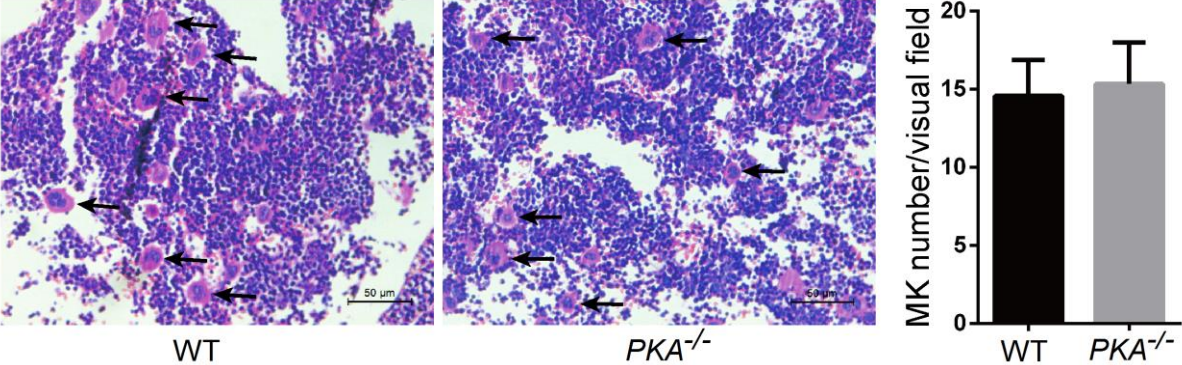

**Supplemental Figure 14**

The number and morphology of megakaryocyte in bone marrow of the *PKA*<sup>-/-</sup> and WT mice (*n* = 5). Representative images of hematoxylin and eosin-stained sections of bone marrow from WT and *PKA*<sup>-/-</sup> mice are shown. Megakaryocytes (MK) are indicated by black arrows. Histogram shows mean ± SD of the MK counts in 10 random selected fields from five separated experiments. Bars = 50 μm.

Supplemental Figure 15

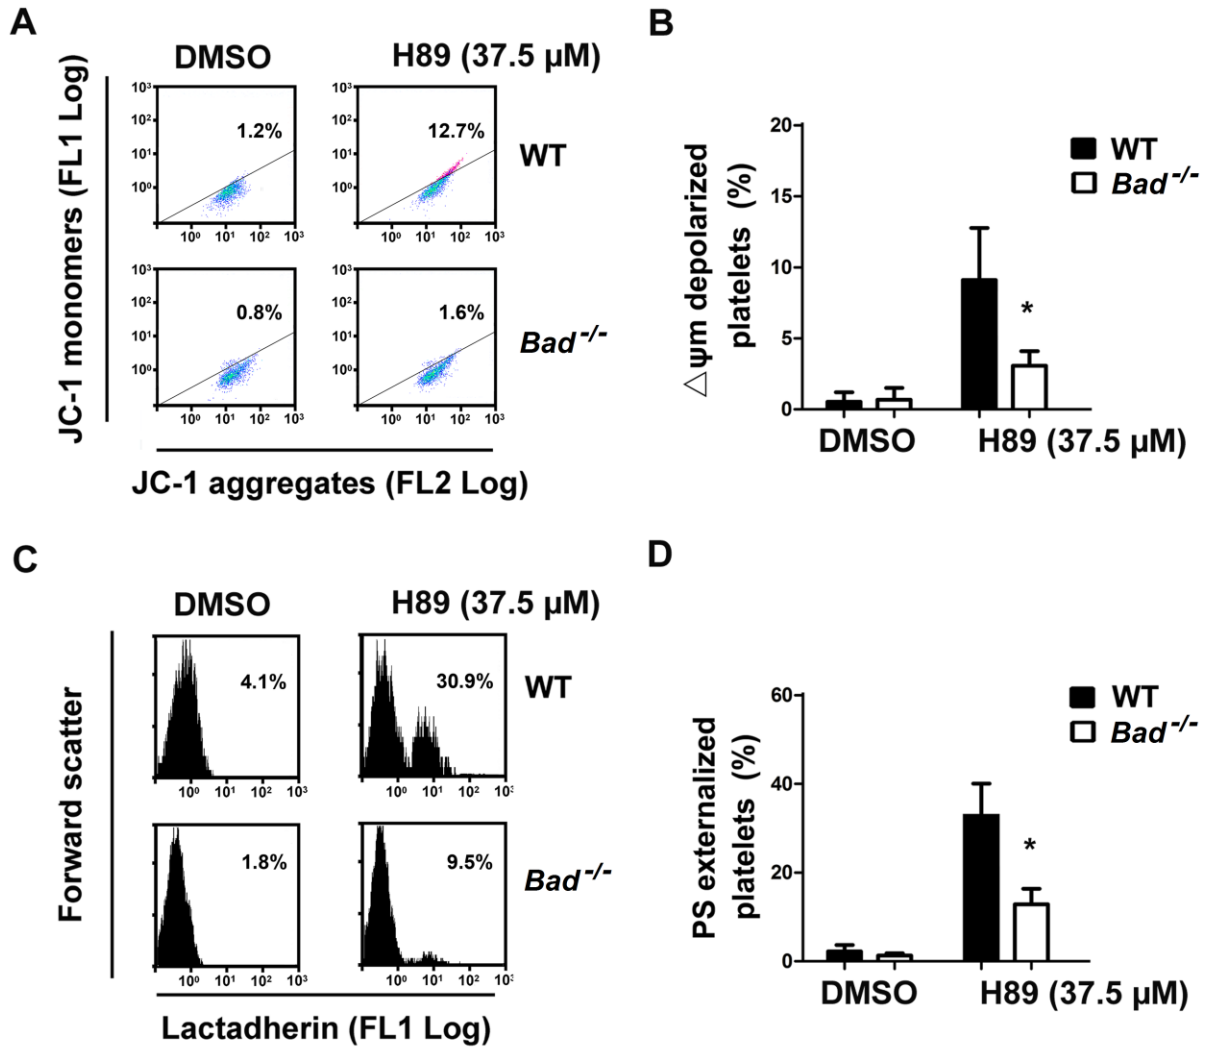

Supplemental Figure 15

PKA inhibitor H99-induced apoptotic events are markedly decreased in *Bad*-deficient platelets. Washed platelets from WT and *Bad*<sup>-/-</sup> mice were incubated with H99 (37.5 μM) or vehicle (DMSO) control at 37°C for 30 min. Representative flow cytometric figures (left) and quantification (right) of  $\Delta\psi_m$  depolarization (**A** and **B**) and PS externalization (**C** and **D**) are shown (mean  $\pm$  SD,  $n = 5$ ). \* $P < 0.05$  compared with control, by one-way ANOVA.

### Supplemental Figure 16

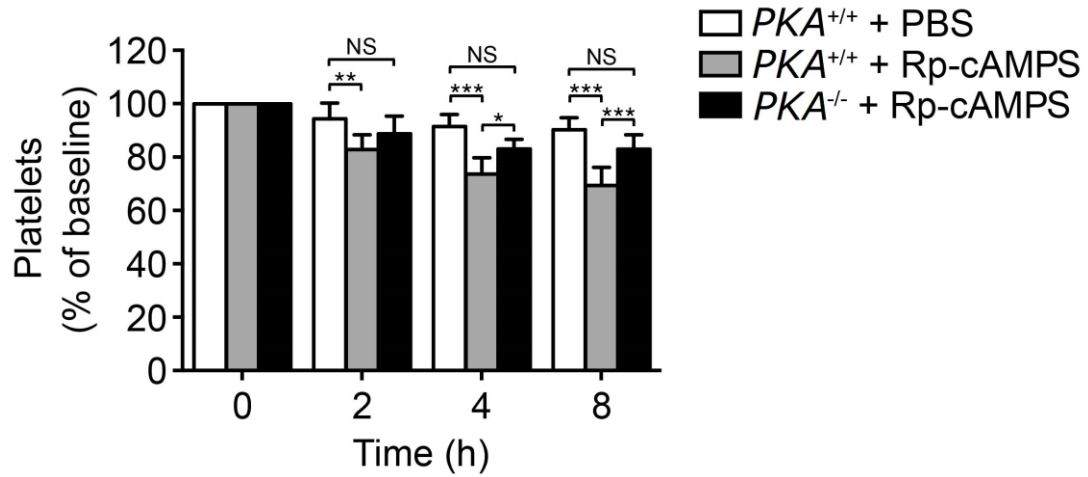

### Supplemental Figure 16

The  $PKA^{-/-}$  mice are less responsive to PKA inhibitor-induced platelet clearance.  $PKA^{-/-}$  and  $PKA^{+/+}$  mice were injected with a single dose of Rp-cAMPS (50 mg/kg) or vehicle (PBS) control through tail vein. Platelet counts were determined at the indicated time points. \* $P < 0.05$ , \*\* $P < 0.01$ , \*\*\* $P < 0.001$ , assessed by two-way ANOVA followed by Tukey's multiple comparison test ( $n = 5$ ). NS, not significant.



Supplemental Figure 17

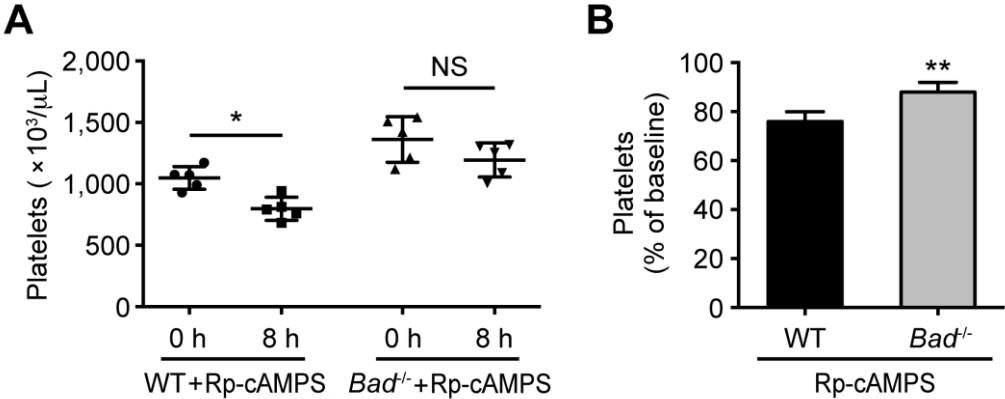

Supplemental Figure 17

Rp-cAMPS-induced platelet clearance in WT and *Bad*<sup>-/-</sup> mice. WT and *Bad*<sup>-/-</sup> mice were injected with a single dose of Rp-cAMPS (4 mg/kg) through tail vein. (A) Platelet counts were determined before and at 8 hours after injection. Data represent absolute platelet counts of each mouse. (B) The platelets of baseline at 8 hours after Rp-cAMPS injection. Data are means ± SD of 5 WT, 5 *Bad*<sup>-/-</sup> male mice. NS, not significant; \**P* < 0.05; \*\**P* < 0.01 compared with WT mice by Student's *t*-test.

## Supplemental Figure 18

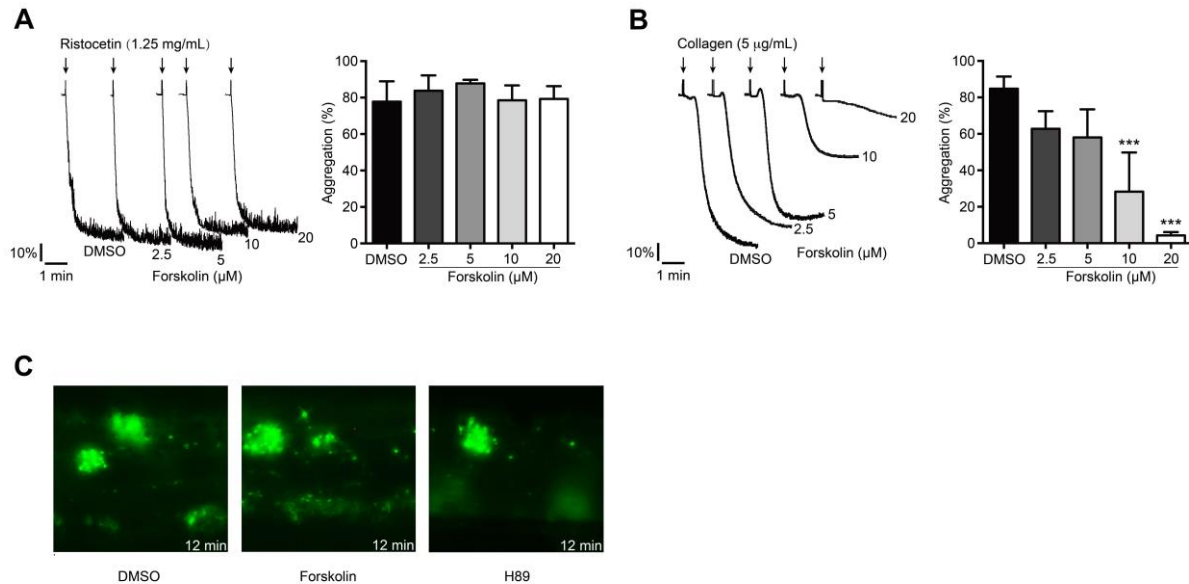

## Supplemental Figure 18

The effects of forskolin on platelet functions. (**A** and **B**) Human washed platelets were incubated with different concentrations of forskolin or vehicle (DMSO) at 22°C for 30 min. The pretreated washed platelets were stimulated with ristocetin (1.25 mg/mL) plus von Willebrand factor (7.5  $\mu$ g/mL) (**A**) and collagen (5  $\mu$ g/mL) (**B**) at 37°C under constant stirring. Platelet aggregation was recorded in a Chrono-Log aggregometer (Havertown, PA). Histograms of maximal platelet aggregation under the indicated conditions are shown as means  $\pm$  SD of 5 independent experiments (\*\**P* < 0.001, by one-way ANOVA). 5  $\mu$ M forskolin did not significantly inhibit platelet aggregation induced by ristocetin and collagen. (**C**) Washed mice platelets were incubated with H89 (25  $\mu$ M), forskolin (5  $\mu$ M) or vehicle (DMSO) at 22°C for 30 min, and were labeled with calcein-AM (5  $\mu$ g/mL). The recipient mice were injected intravenously with pretreated platelets ( $5 \times 10^6$ /g). FeCl<sub>3</sub>-induced mesenteric arteriole thrombosis in the mice was recorded by real time microscopy at 12 min. There is not visible difference in the presence of labeled platelets pre-treated with different reagents in the thrombus. Each image is representative of five mice.

## Supplemental Figure 19

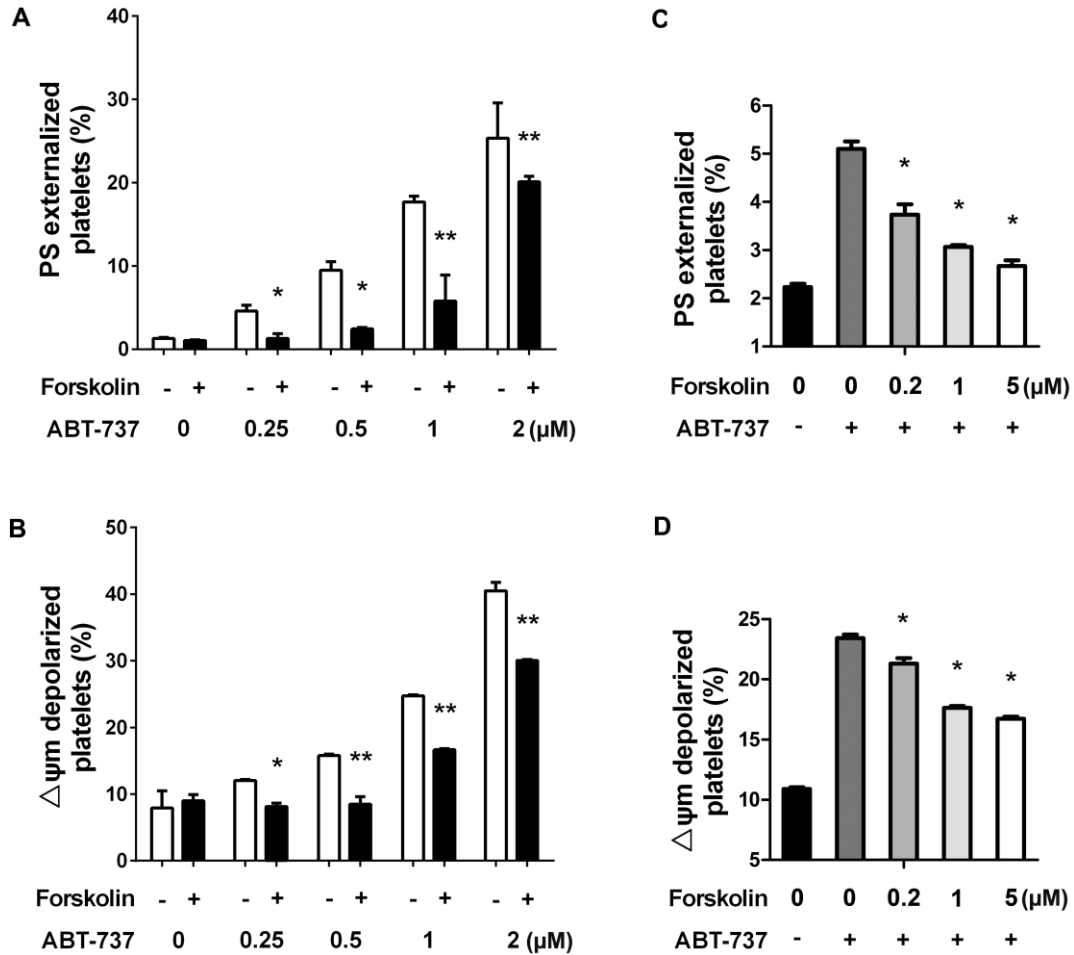

## Supplemental Figure 19

PKA activator protects platelets from apoptosis induced by ABT-737. (**A** and **B**) Platelets were incubated with forskolin (10 μM) or vehicle at RT for 10 min, and further incubated with different concentrations of ABT-737 at 37°C for 90 min, Δψ<sub>m</sub> depolarization and PS exposure in platelets were analyzed flow cytometry. (**C** and **D**) Platelets were incubated with different concentrations of forskolin at RT for 10 min, and further incubated with ABT-737 (1 μM) at 37°C for 90 min, Δψ<sub>m</sub>-depolarization and PS exposure are shown. \**P* < 0.05, \*\**P* < 0.01, compared with vehicle control, by one-way ANOVA.

## Supplemental Figure 20

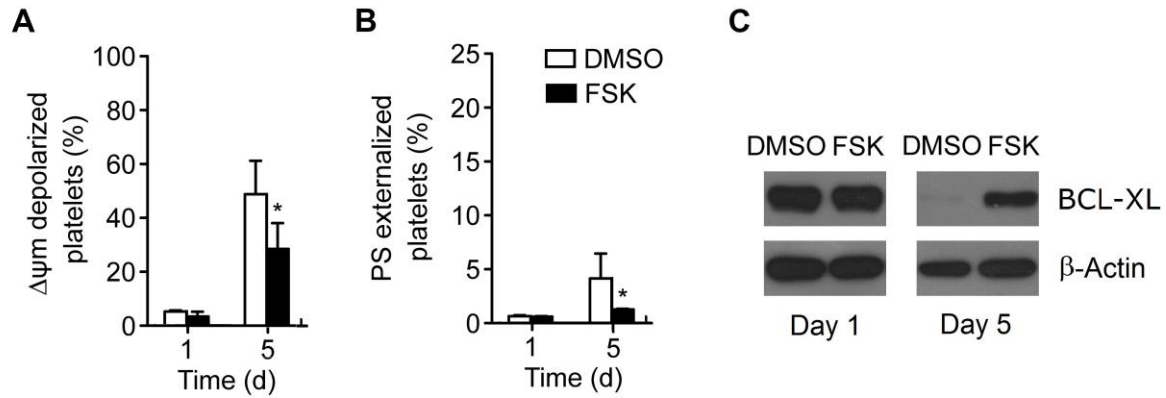

## Supplemental Figure 20

PKA activator forskolin inhibits BCL-XL degradation. Washed human platelets ( $3 \times 10^8/\text{mL}$ ) were incubated with forskolin (5  $\mu\text{M}$ ) or vehicle at 22°C for indicated time. JC-1 was added into the platelets to a final concentration of 2  $\mu\text{g}/\text{mL}$  and incubated in the dark for 10 min (**A**). The platelets were incubated with Lactadherin to a final concentration of 5  $\mu\text{g}/\text{mL}$  in the dark for 30 min (**B**). The platelets were analyzed with flow cytometry. Means  $\pm$  SD of the percentage of  $\Delta\psi_m$ -depolarized platelets (**A**) and PS positive platelets (**B**) from three independent experiments are shown. (**C**) The platelets were lysed with an equal volume of lysis buffer on ice for 30 min. Proteins were separated by SDS-PAGE. After blocking, membranes were incubated with primary antibodies against BCL-XL (1:1000) and  $\beta$ -actin (1:1000) at 4°C overnight. The protein bands were visualized by the ECL chemiluminescence system. The figure is representative of four separate experiments with different donors. \* $P < 0.05$ , compared with vehicle control by Student's  $t$ -test. FSK: forskolin.

## Supplemental Tables

**Supplemental Table 1: Clinical characteristics of patients with ITP**

| Donors | Age sex             | Acute or chronic | PLT ( $\times 10^9/L$ ) | Anti-Platelets antibodies                 | Reticulated platelet ( $12.5 \pm 4.15\%$ ) | PAIgG ( $35.6 \pm 7.4\%$ ) |
|--------|---------------------|------------------|-------------------------|-------------------------------------------|--------------------------------------------|----------------------------|
| 1      | 72 years old Male   | Acute            | 10                      | GP1b +<br>GPIX -<br>GP II b -<br>GPIIIa - | 7.7                                        | 45.8                       |
| 2      | 28 years old Female | Acute            | 20                      | GP1b +<br>GPIX +<br>GP II b -<br>GPIIIa - | 10.5                                       | 37.1                       |
| 3      | 60 years old Male   | Acute            | 15                      | GP1b +<br>GPIX +<br>GP II b -<br>GPIIIa - | 7.7                                        | 30                         |
| 4      | 45 years old Female | Acute            | 19                      | GP1b +<br>GPIX +<br>GP II b +<br>GPIIIa + | 2.6                                        | 28.3                       |
| 5      | 23 years old Male   | Acute            | 21                      | GP1b +<br>GPIX +<br>GP II b +<br>GPIIIa + | 4.5                                        | 52.4                       |
| 6      | 52 years old Female | Acute            | 27                      | GP1b +<br>GPIX +<br>GP II b +<br>GPIIIa + | 10.2                                       | 37.1                       |
| 7      | 71 years old Female | chronic          | 24                      | GP1b +<br>GPIX +<br>GP II b +<br>GPIIIa + | 8.3                                        | 46.4                       |

|    |                        |         |    |                                           |      |      |
|----|------------------------|---------|----|-------------------------------------------|------|------|
| 8  | 67 years old<br>Female | Acute   | 18 | GP1b +<br>GPIX +<br>GP II b +<br>GPIIIa - | 7.2  | 73.1 |
| 9  | 45 years old<br>Female | chronic | 31 | GP1b +<br>GPIX +<br>GP II b +<br>GPIIIa - | 23.5 | 32.9 |
| 10 | 30 years old<br>Female | Acute   | 13 | GP1b +<br>GPIX +<br>GP II b +<br>GPIIIa - | 16.8 | 32.9 |
| 11 | 32 years old<br>Male   | chronic | 13 | GP1b +<br>GPIX -<br>GP II b -<br>GPIIIa - | 15.3 | 49.9 |
| 12 | 72 years old<br>Male   | Acute   | 43 | GP1b -<br>GPIX -<br>GP II b +<br>GPIIIa - | 24.1 | 56   |
| 13 | 46 years old<br>Female | Acute   | 92 | GP1b +<br>GPIX +<br>GP II b +<br>GPIIIa - | 12.8 | 41.2 |
| 14 | 25 years old<br>Female | Acute   | 10 | GP1b +<br>GPIX -<br>GP II b -<br>GPIIIa - | 5.7  | 35.4 |
| 15 | 32 years old<br>Female | Acute   | 68 | GP1b +<br>GPIX -<br>GP II b +<br>GPIIIa - | 10.4 | 50.5 |
| 16 | 59 years old<br>Female | Acute   | 21 | GP1b +<br>GPIX -<br>GP II b -<br>GPIIIa - | 14.4 | 37.3 |

|    |                        |       |                      |                                            |       |      |
|----|------------------------|-------|----------------------|--------------------------------------------|-------|------|
| 17 | 47 years old<br>Female | Acute | 11                   | GP1b +<br>GPIX -<br>GP II b -<br>GPIIIa -  | 6.9   | 54.9 |
| 18 | 24 years old<br>Female | Acute | 218                  | GP1b +<br>GPIX +<br>GP II b +<br>GPIIIa -  | 6.9   | 50.9 |
| 19 | 54 years old<br>Female | Acute | 73                   | GP1b +<br>GPIX -<br>GP II b -<br>GPIIIa -  | 11.5  | 48.7 |
| 20 | 71 years old<br>Female | Acute | Not<br>availabl<br>e | GP1b -<br>GPIX+<br>GP II b -<br>GPIIIa -   | 16.9  | 68.4 |
| 21 | 27 years old<br>Female | Acute | 7                    | GP1b +<br>GPIX +<br>GP II b +<br>GPIIIa -  | 4.1   | 96   |
| 22 | 70 years old<br>Female | Acute | 9                    | GP1b +<br>GPIX +<br>GP II b +<br>GPIIIa +  | 16.1  | 48.8 |
| 23 | 69 years old<br>Female | Acute | 17                   | GP1b -<br>GPIX +<br>GP II b +<br>GPIIIa -  | 3.1   | 28.2 |
| 24 | 51 years old<br>Female | Acute | 2                    | GP1b +<br>GPIX +<br>GP II b +<br>GPIIIa -  | 64.8  | 57   |
| 25 | 23 years old<br>Female | Acute | 5                    | GP1b +<br>GPIX +<br>GP II b +<br>GP IIIa - | 0.464 | 35.9 |

Accordance with the 2012 guidelines (1), ITP is an autoimmune disease characterized by isolated thrombocytopenia (platelet count  $< 100 \times 10^9/L$ ) due to increased platelet destruction and decreased platelet production. ITP remains a diagnosis of exclusion and presents without decrease of red and white blood cell count, normally morphological platelets on the peripheral blood smear, and normal-appearing bone marrow.



**Supplemental Table 2: Clinical characteristics of patients with type 2 diabetes mellitus**

| Donors | Age sex             | Duration of Diabetes (years) | Other clinical diagnoses                | PLT ( $\times 10^9/L$ ) | FPG (mmol/L) | HbA <sub>1c</sub> (%) | Treatment                           |
|--------|---------------------|------------------------------|-----------------------------------------|-------------------------|--------------|-----------------------|-------------------------------------|
| 1      | 50 years old Female | 4                            | Hypertension                            | 284                     | 9.3          | 7.5                   | Metformin<br>Acarbose<br>Rui ketone |
| 2      | 56 years old Female | 6                            | Cataract<br>Upper respiratory infection | 142                     | 16.7         | 8.6                   | Insulin<br>Cephalosporins           |
| 3      | 54 years old Female | 4                            | Diabetic Nephropathy                    | 260                     | 6.1          | 6.5                   | Insulin                             |
| 4      | 58 years old Female | 10                           | Hypertension                            | 187                     | 12.4         | 11.7                  | Insulin<br>Amlodipine Besylate      |
| 5      | 38 years old Male   | 10                           | Hypertension                            | 149                     | 4.8          | 6.7                   | Insulin<br>Amlodipine Besylate      |
| 6      | 43 years old Male   | 10                           | None reported                           | 211                     | 9.7          | 8.7                   | Insulin<br>Exenatide Injection      |
| 7      | 45 years old Male   | 8                            | Hypertension<br>Cataract                | 155                     | 10.6         | 9.0                   | Insulin<br>Acarbose                 |
| 8      | 46 years old Male   | 11                           | Hypertension                            | 194                     | 12.9         | 10.3                  | Insulin<br>Amlodipine Besylate      |
| 9      | 50 years old Male   | 3                            | Hypertension<br>Diabetic Nephropathy    | 184                     | 6.6          | 6.0                   | Insulin<br>Amlodipine Besylate      |
| 10     | 57 years old Male   | 19                           | Hypertension<br>Diabetic Nephropathy    | 234                     | 6.4          | 6.6                   | Insulin<br>Amlodipine Besylate      |
| 11     | 66 years old Male   | 15                           | Hypertension<br>Diabetic Nephropathy    | 169                     | 5.2          | 5.9                   | Insulin<br>Levamlodipine            |

Accordance with the 2002 guidelines (2), diabetes is diagnosed when fasting plasma glucose (FPG) is 7.0 mmol/L (126 mg/dL) or higher, and/or plasma glucose 2 h after 75 g glucose load

(2hPG) is 11.1 mmol/L (200 mg/dL) or higher. A casual plasma glucose (PG)  $\geq$  11.1 mmol/L (200 mg/dL) also indicates diabetic type. Hyperglycemia is shown on two or more occasions examined on separate days. Diabetes can be diagnosed by a single PG test of Hyperglycemia if one of the following three conditions co-exists, (1) typical symptoms of diabetes mellitus; (2) HbA1c  $\geq$  6.5% by a standardized method; or (3) unequivocal diabetic retinopathy.

**Supplemental Table 3: Clinical characteristics of patients with Sepsis**

| Donors | Age sex             | Other clinical diagnoses                 | cultures                                   | PLT ( $\times 10^9$ /L) | WBC ( $\times 10^9$ /L) | Respiratory rate (breaths/min) | heart rate (beats/min) | Temperature ( $^{\circ}$ C) |
|--------|---------------------|------------------------------------------|--------------------------------------------|-------------------------|-------------------------|--------------------------------|------------------------|-----------------------------|
| 1      | 28 years old Male   | Trauma                                   | <i>S.haemolyticus</i>                      | 176                     | 20.6                    | 21                             | 134                    | 37.2                        |
| 2      | 82 years old Male   | Pulmonary infection, cough               | <i>K.pneumoniae</i>                        | 148                     | 9                       | 25                             | 87                     | 38.4                        |
| 3      | 63 years old Male   | COPD                                     | <i>P.aeruginosa</i>                        | 61                      | 14.5                    | 16                             | 133                    | 37.0                        |
| 4      | 16 years old Female | Pulmonary infection, cough               | <i>S.haemolyticus</i>                      | 27                      | 18.6                    | 28                             | 144                    | 37.6                        |
| 5      | 82 years old Male   | Pulmonary infection, Cerebral infarction | <i>P.aeruginosa</i><br><i>K.pneumoniae</i> | 210                     | 27.8                    | 15                             | 102                    | 39.4                        |
| 6      | 69 years old Male   | Biliary tract infection                  | <i>E.coli</i><br><i>Streptococcus</i>      | 116                     | 20.7                    | 22                             | 115                    | 39.4                        |
| 7      | 80 years old Male   | Acute cholecystitis<br>Septic shock      | <i>E.coli</i>                              | 67                      | 26.3                    | 24                             | 112                    | 39.9                        |
| 8      | 83 years old Female | Multiple fractures                       | <i>E.coli</i>                              | 6                       | 21                      | 30                             | 104                    | 39.5                        |
| 9      | 82 years old Female | Pulmonary infection<br>Septic shock      | <i>E.coli</i>                              | 86                      | 49.8                    | 21                             | 130                    | 39.1                        |
| 10     | 65 years old Male   | Pulmonary infection<br>cough             | <i>S. aureus</i>                           | 91                      | 12.3                    | 20                             | 105                    | 38.5                        |
| 11     | 80 years old Male   | Intestinal obstruction                   | <i>B. Bacillus</i>                         | 125                     | 16.1                    | 15                             | 109                    | 37.4                        |
| 12     | 72 years old Female | Pancreatitis                             | <i>E.coli</i>                              | 109                     | 8.9                     | 25                             | 96                     | 38.5                        |

|    |                      |                        |                       |     |      |    |     |      |
|----|----------------------|------------------------|-----------------------|-----|------|----|-----|------|
| 13 | 82 years old<br>Male | Cholecystitis          | <i>E.coli</i>         | 170 | 13.0 | 28 | 100 | 39.1 |
| 14 | 84 years old<br>Male | None                   | <i>E.<br/>faecium</i> | 228 | 9.8  | 18 | 114 | 38.0 |
| 15 | 78 years old<br>Male | Cerebral<br>infarction | <i>S.<br/>aureus</i>  | 113 | 20.7 | 18 | 85  | 38.0 |

Accordance with the 2012 guidelines (3), sepsis is defined as one or more positive cultures in blood samples from patients with clinical signs of infection at least two of the following: temperature < 36°C or > 38°C, heart rate > 90 beats/minute, respiratory rate > 20 breaths/minute, PaO<sub>2</sub> < 4.3 kPa (32 mmHg), or white blood cell (WBC) count < 4000 or > 12,000/mm<sup>3</sup>.

**Supplemental Table 4: Hematologic analysis of PKA<sup>+/+</sup>, PKA<sup>+/-</sup> and PKA<sup>-/-</sup> mice**

| Hematological parameter  | PKA <sup>+/+</sup><br>n=10 | PKA <sup>+/-</sup><br>n=5 | PKA <sup>-/-</sup><br>n=7 |
|--------------------------|----------------------------|---------------------------|---------------------------|
| WBC(10 <sup>9</sup> /L)  | 9.283±2.349                | 8.546±3.662               | 8.762±2.285               |
| NEUT(10 <sup>9</sup> /L) | 1.795±1.648                | 3.548±1.657               | 2.527±2.115               |
| RBC(10 <sup>9</sup> /L)  | 8.937±0.744                | 9.290±1.097               | 9.560±0.589               |
| HGB(g/L)                 | 132.8±8.442                | 132.0±10.58               | 138.8±5.848               |
| HCT(%)                   | 41.17±2.074                | 40.93±2.650               | 41.94±0.782               |
| MCV(fL)                  | 46.21±2.209                | 44.96±2.302               | 43.98±2.245               |
| MCH(pg)                  | 14.90±0.542                | 14.46±0.513               | 14.52±0.376               |
| MCHC(g/L)                | 322.5±5.806                | 322.3±5.033               | 330.6±9.914               |
| RET(%)                   | 5.007±2.005                | 3.403±2.377               | 3.764±1.262               |

WBC, white blood cell; NEUT, neutrophil; RBC, red blood cell; HCT, hematocrit; HGB, hemoglobin; MCH, mean corpuscular hemoglobin; MCHC, mean corpuscular hemoglobin concentration; MCV, mean corpuscular volume; RET, reticulocyte. Data are means ± SD.

**Supplemental Reference**

1. Chalmers S and Tarantino MD. Romiplostim as a treatment for immune thrombocytopenia: a review. *J Blood Med.* 2015;6:37-44.
2. Kuzuya T, et al. Report of the Committee on the classification and diagnostic criteria of diabetes mellitus. *Diabetes Res Clin Pract.* 2002;55(1):65-85.
3. Dellinger RP, et al. Surviving sepsis campaign: international guidelines for management of severe sepsis and septic shock: 2012. *Crit Care Med.* 2013;41(2):580-637.
